# Supplementary material
Source: PubMed Central journal article supplement (PMC2948486)

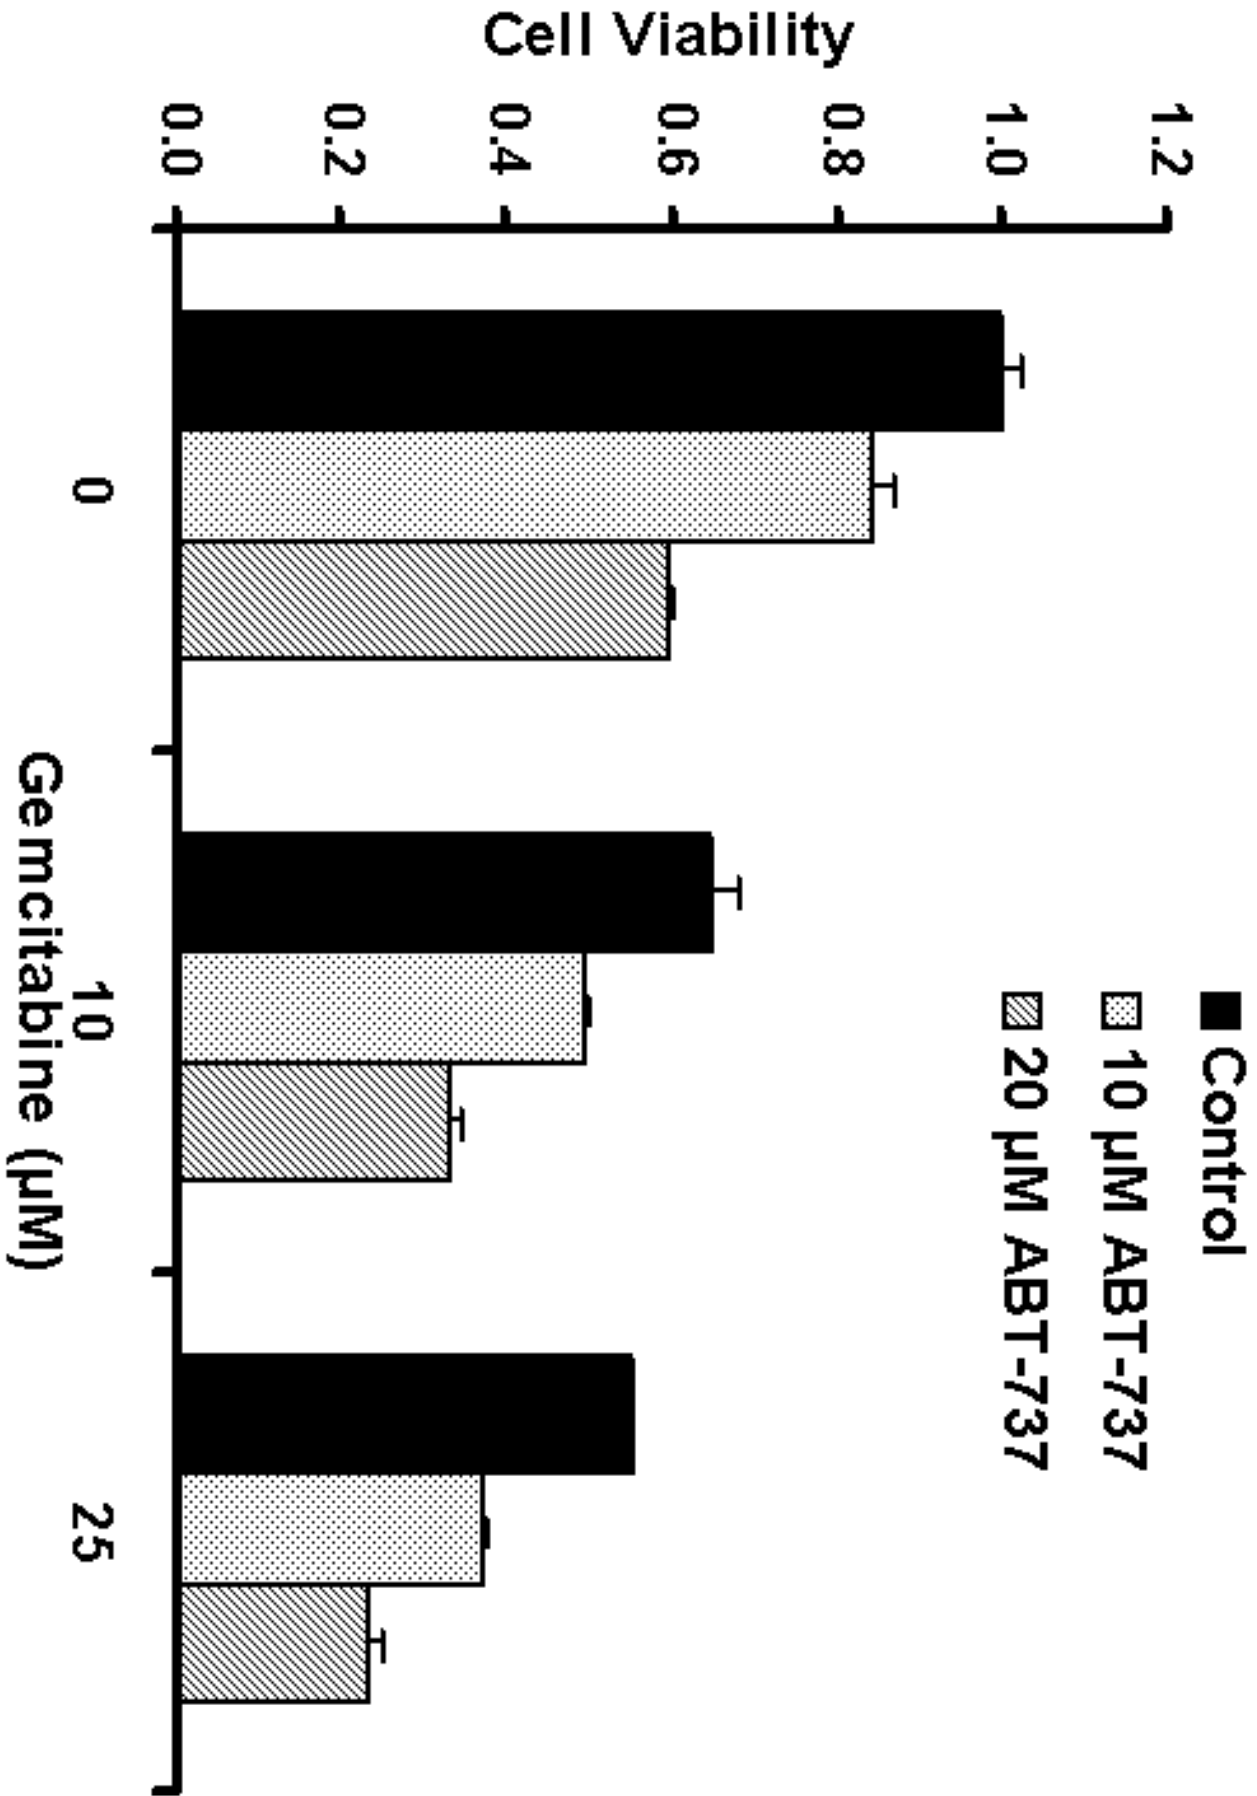

Fig. S1

Supplement: NIHMS225431-supplement-Suppl_Fig_1.pdf [file NIHMS225431-supplement-Suppl_Fig_1.pdf]

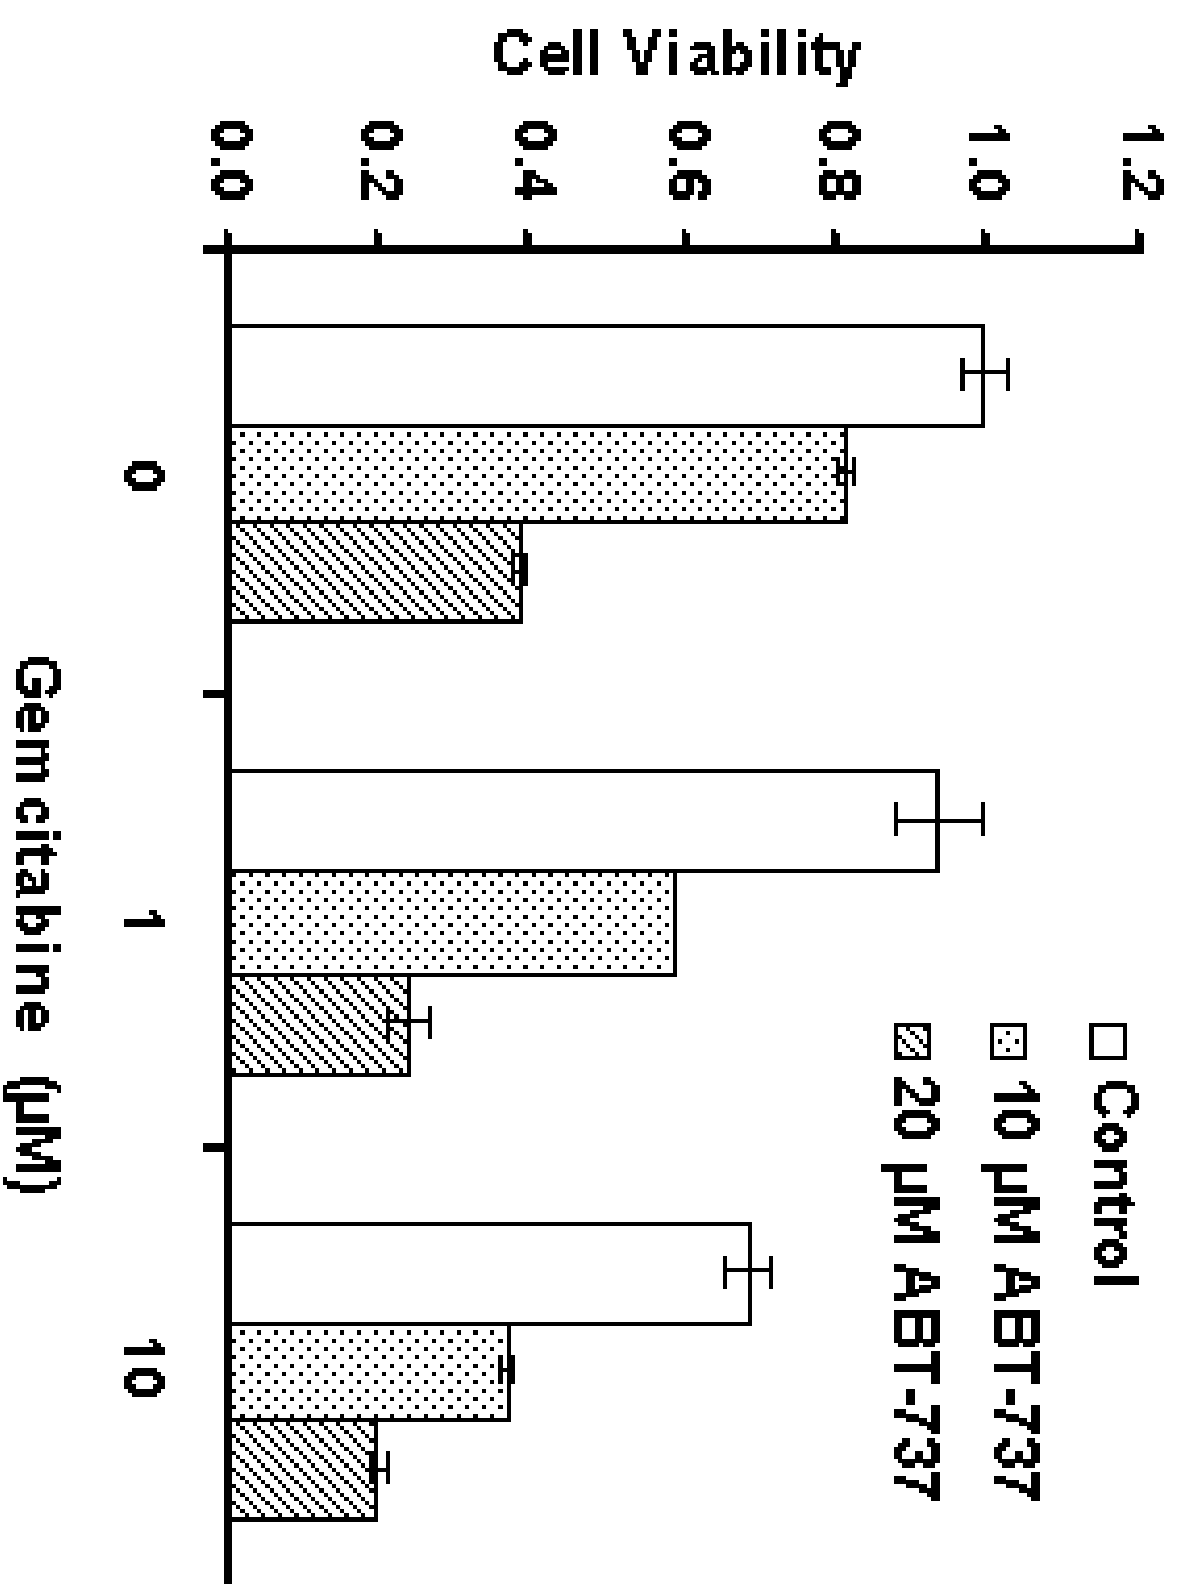

Fig.S2

Supplement: NIHMS225431-supplement-Suppl_Fig_2.pdf [file NIHMS225431-supplement-Suppl_Fig_2.pdf]
